# Supplementary material for: Facilitating healthcare decisions by assessing the certainty in the evidence from preclinical animal studies
Source: PLoS One. 2018 Jan 11;13(1):e0187271. doi: 10.1371/journal.pone.0187271 (PMC5764235; doi:10.1371/journal.pone.0187271)
Supplement: S3 Table — (XLSX) [file pone.0187271.s003.xlsx]

## Sheet: Sheet1
S3 Table: Summary of all (unduplicated) criteria possibly related to certainty in the evidence
GRADE category	Item
Dose respons	Dose response
Imprecision	Sample size (calculation)
	Appropriate statisitcal methods
	Measurement of variation
	Power
Inconsistency	Test conditions (which might influence outcome): Housing and husbandry, food and water regimes
	Statistical model explained
	Large variaiton in studies
	Consistency across species
Indirectness	Animal characteristics (age,weight, species, strain)
	Animals with comorbidity
	Appropriate model
	Co-interventions or co-treatments / contamination
	Co-morbidity/ healthy
	Inclusion exclusion criteria stated
	Intervention characterisitcs (duration, timing, dose)
	Optimal time window used
	Outcome assessment (more than 2 outcomes, chronic and acute)
	Outcome characteristics
	Physiological variables monitored/ normal
	Surrogate outcomes
	Test animal details
	Tested in male and female animals
	Tested in multiple species
	Treatment efficacy should be tested with two or more species
	Treatment/ therapeutic intervention; timing frequency, dose, route of administration
	Between species homogeneity
	Consistency with other findings
	Disease model characteristics
	Diagnostic methods
Publication bias	publication bias
Study limitations	Selection bias; Allocation concealment
	Attrition bias (nr of animals, drop outs, reason for drop out)
	Detection bias
	Performance bias
	Baseline characteristics comparable
	Completeness of follow-up;
	Conflict of interest disclosed
	Confounding
	Evidence succesful disease induction
	Funding
	Intention to treat
	Methodological quality in general
	Study design
Other	Ability to generalise
	Adverse events consequences for intervention
	Compliance with animal welfare regulations
	Control group (present, appropriate)
	Funding statement
	General publication
	General study design
	Inflating or deflating potential side effects
	Items arrive guidelines
	Methods used
	Peer review
	Presence of small study effect
	Study objective
	Poor reporting of methodological items
	Limitatons in SR methods (1 database, not corrected for control group, subgroup tool small, language restricitions, small studies excluded)
